# Supplementary material for: Dp412e: a novel human embryonic dystrophin isoform induced by BMP4 in early differentiated cells
Source: PubMed Central journal article supplement (PMC4644319; doi:10.1186/s13395-015-0062-6), 2015-11-14
Supplement: 13395_2015_62_MOESM1_ESM.pdf [file 13395_2015_62_MOESM1_ESM.pdf]

| <b>Alias</b>        | <b>Cell Lines</b> | <b>Reprogramming method</b> | <b>Reprogrammed cells</b> | <b>Provided by</b>               | <b>DMD gene mutations</b>        |
|---------------------|-------------------|-----------------------------|---------------------------|----------------------------------|----------------------------------|
| <b>hESCs 1</b>      | SA001             | -                           | -                         | Cellartis AB                     | -                                |
| <b>hESCs 2</b>      | H9                | -                           | -                         | Wicell research institute        | -                                |
| <b>hiPSCs 1</b>     | VAX1024           | Amphotropic retroviruses    | Myoblasts                 | Celogos                          | -                                |
| <b>hiPSCs 2</b>     | M00180            | Ecotropic retroviruses      | Myoblasts                 | Cochin Hospital-Cochin Institute | -                                |
| <b>hiPSCs 3</b>     | M00194            | Ecotropic retroviruses      | Myoblasts                 | Cochin Hospital-Cochin Institute | -                                |
| <b>hiPSCs 4</b>     | M00398            | Ecotropic retroviruses      | Myoblasts                 | Cochin Hospital-Cochin Institute | -                                |
| <b>DMD hiPSCs 1</b> | M00197            | Ecotropic retroviruses      | Myoblasts                 | Cochin Hospital-Cochin Institute | In-frame Duplication exons 3-26  |
| <b>DMD hiPSCs 2</b> | M00202            | Ecotropic retroviruses      | Myoblasts                 | Cochin Hospital-Cochin Institute | Out-of-frame Deletion exons 8-43 |
| <b>DMD hiPSCs 3</b> | M00418            | Ecotropic retroviruses      | Myoblasts                 | Cochin Hospital-Cochin Institute | Stop exon 7 c                    |
