# Supplementary material for: Dp412e: a novel human embryonic dystrophin isoform induced by BMP4 in early differentiated cells
Source: PubMed Central journal article supplement (PMC4644319; doi:10.1186/s13395-015-0062-6), 2015-11-14
Supplement: 13395_2015_62_MOESM2_ESM.pdf [file 13395_2015_62_MOESM2_ESM.pdf]

| Targets                                                                                                                                                                                                                                              | Primers                                                                       | Amplicons (bp) |
|------------------------------------------------------------------------------------------------------------------------------------------------------------------------------------------------------------------------------------------------------|-------------------------------------------------------------------------------|----------------|
| <i>ACTC1</i> (NM_005159)                                                                                                                                                                                                                             | QT00205296 <sup>1</sup>                                                       | 105            |
| <i>ACTA2</i> (NM_001613.2, NM_001141945.1)                                                                                                                                                                                                           | Fw 5'-TCCTCCCTTGAGAAGATTACGA-3'<br>Rv 5'-GGAGCAGGAAGTGTTTTAGAAGC-3'           | 445            |
| <i>BMP4</i> (NM_130851.2, NM_130850.2, NM_001202.3)                                                                                                                                                                                                  | Fw 5'-ATGATTCCTGGTAACCGAATGC-3'<br>Rv 5'-CCCCGTCTCAGGTATCAAAC-3'              | 93             |
| <i>DMD</i> exons 2_3<br>(NM_004010.3, NM_004009.3, NM_004006.2, NM_000109.3)                                                                                                                                                                         | Fw 5'-TCACAAAATGGGTAAATGCACAA-3'<br>Rv 5'-TGTAGGTCACTGAAGAGTTCTCAA-3'         | 73             |
| <i>DMD</i> exons 20_21 (NM_004010.3, NM_004009.3, NM_004006.2, NM_000109.3)                                                                                                                                                                          | Fw 5'-ACCCACCACCCCATCAGA-3'<br>Rv 5'-CGGTTGACTTCATCCTTACAAATTT-3'             | 69             |
| <i>DMD</i> exons 45-46 (NM_004020.3, NM_004023.2, NM_004022.2, NM_004021.2, NM_004013.2, NM_004012.3, NM_004011.3, NM_004010.3, NM_004009.3, NM_004006.2, NM_000109.3)                                                                               | Fw 5'-GGCAGGAGTCTGCAACACAG-3'<br>Rv 5'-GGTTCAAGTGGGATACTAGCAATGT-3'           | 145            |
| <i>DMD</i> exons 64-65 (NM_004020.3, NM_004023.2, NM_004022.2, NM_004021.2, NM_004018.2, NM_004017.2, NM_004016.2, NM_004015.2, NM_004014.2, NM_004013.2, NM_004012.3, NM_004011.3, NM_004010.3, NM_004009.3, NM_004006.2, NM_000109.3, NM_004019.2) | Fw 5'-GGCCCTTTGCTTGGATCTCT-3'<br>Rv 5'-GTGCTGGTCCAAGGCATCA-3'                 | 58             |
| <i>DMD Dp427m</i> (NM_004006.2)                                                                                                                                                                                                                      | Fw 5'-GTGGGAAGAAGTAGAGGACTGT-3'<br>Rv 5'-TCCTGTAGGTCACTGAAGAGGT-3'            | 129            |
| <i>DMD Dp427c</i> (NM_000109.3)                                                                                                                                                                                                                      | Fw 5'-TGGCATGATGGAGTGACAGGA-3'<br>Rv 5'-CCCATCCTGTAGGTCAGTCAA-3'              | 150            |
| <i>DMD Dp427p1p2</i> (NM_004009.3, NM_004010.3)                                                                                                                                                                                                      | Fw 5'-GAAATGCTGTAGGTCTCATCTGATGA-3'<br>Rv 5'-GCTGCTTCCCAAACCTTAGAAAATTGTGC-3' | 97             |
| <i>Dp412e</i> (used with the reverse primer of <i>DMD</i> exons 2_3 set)                                                                                                                                                                             | Fw 5'-CCCAGCAATAAGGATGAAAGAGA-3'                                              | 116            |
| <i>EYA1</i> (NM_000503, NM_172058, NM_172059)                                                                                                                                                                                                        | QT00070980 <sup>1</sup>                                                       | 110            |
| <i>GAPDH</i>                                                                                                                                                                                                                                         | QT00079247 <sup>1</sup>                                                       |                |
| <i>GATA4</i> (NM_002052.3)                                                                                                                                                                                                                           | Fw 5'-CGACACCCCAATCTCGATATG-3'<br>Rv 5'-GTTGCACAGATAGTGACCCGT-3'              |                |
| <i>ISL1</i> (NM_002202.2)                                                                                                                                                                                                                            | Fw 5'-CACACAGCGGAAACACTCGAT-3'<br>Rv 5'-TACGGGATCAAATGCGCCAA-3'               | 102            |
| <i>MSX1</i> (NM_002448)                                                                                                                                                                                                                              | QT00224350 <sup>1</sup>                                                       | 96             |
| <i>MYF5</i> (NM_005593.2)                                                                                                                                                                                                                            | Fw 5'-AACCCTCAAGAGGTGTACCAC-3'<br>Rv 5'-AGGACTGTTACATTCGGGCAT-3'              | 208            |
| <i>MYF6</i> (NM_002469.2)                                                                                                                                                                                                                            | Fw 5'-GGAGCGCCATCAGCTATATTG-3'<br>Rv 5'-ATCCGCACCCTCAAGATTTTC-3'              | 131            |
| <i>MYOD1</i> (NM_002478.4)                                                                                                                                                                                                                           | Fw 5'-GGGGCTAGGTTACGCTTTCT-3'<br>Rv 5'-CTACATTTGGGACCGGAGTG-3'                | 129            |
| <i>MYOG</i> (NM_002479.5)                                                                                                                                                                                                                            | Fw 5'-TAAGGTGTGTAAGAGGAAGTCG-3'<br>Rv 5'-CCACAGACACATCTTCCACTGT-3'            | 437            |
| <i>PAX3</i> (NM_181459.3, NM_001127366.2, NM_000438.5, NM_181458.3, NM_181457.3, NM_013942.4, NM_181460.3, NM_181461.3)                                                                                                                              | Fw 5'-AGTTCATCAGCCGCATC-3'<br>Rv 5'-TTCTTCTCGCTTTCCTCTGC-3'                   | 95             |
| <i>PAX7</i> (NM_002584.2, NM_013945.2, NM_001135254.1)                                                                                                                                                                                               | Fw 5'-CAAGATTCTTTGCCGCTACC-3'<br>Rv 5'-TTCAGTGGGAGGTCAGGTTTC-3'               | 384-390        |
| <i>PITX2</i><br>(NM_153427.2, NM_153426.2, NM_001204399.1, NM_001204398.1, NM_001204397.1, NM_000325.5)                                                                                                                                              | Fw 5'-GCCAGGACCCGTCTAAGA-3'<br>Rv 5'-CTGGCTGGTAAAGTGAGTCCG-3'                 | 60             |
| <i>POU5F1</i> endogenous <sup>2</sup><br>(NM_001285987.1, NM_203289.5, NM_001285986.1, NM_001173531.2, NM_002701.5)                                                                                                                                  | Fw 5'-CCTCACTTCACTGCACTGTA-3'<br>Rv 5'-CAGTTTTTCTTTCCCTAGCT-3'                | 164            |
| <i>PPIA</i> (NM_001300981.1, NM_021130.4)                                                                                                                                                                                                            | Fw 5'-GGTGACTTCACACGCCATAATG-3'<br>Rv 5'-ACAAGATGCCAGGACCCGTAT-3'             | 103            |
| <i>SOX2</i> endogenous (NM_003106.3)                                                                                                                                                                                                                 | Fw 5'-CCGGTACGCTCAAAAAGAAA-3'<br>Rv 5'-TGTCATTTGCTGTGGGTGAT-3'                | 59             |
| <i>T</i> (NM_003181.3, NM_003181.3)                                                                                                                                                                                                                  | Fw 5'-ATGAAGGCTCCCGTCTCC-3'<br>Rv 5'-CACCCTATGAAGTGGGTCT-3'                   | 177            |
| <i>UBC</i> (NM_021009.6)                                                                                                                                                                                                                             | Fw 5'-ATTTGGGTCGCGTTCTTG-3'<br>Rv 5'-TGCCTTGACATTCTCGATGGT-3'                 | 133            |

<sup>1</sup> Quantitect primer assay (Qiagen) <sup>2</sup> Park et al, 2008
