# Supplementary material for: Dp412e: a novel human embryonic dystrophin isoform induced by BMP4 in early differentiated cells
Source: PubMed Central journal article supplement (PMC4644319; doi:10.1186/s13395-015-0062-6), 2015-11-14
Supplement: 13395_2015_62_MOESM6_ESM.pdf [file 13395_2015_62_MOESM6_ESM.pdf]

**a**

**Dp427c related RACE sequence** (chromosome X position of the sequence in black: 33357376-33357539 (BLAT DNA 2009 (GRCh37/hg19))

GGAATTCAAATAGACTTTCTGGTCCCAGCAGTCGGCAGTAATAGAATGCTTTCAGGAAGATGACAGAATCAGGAGAAA  
GATGCTGTTTTGCACTATCTTGATTGTTACAGCAGCCAACCTATTGGCATGATGGAGTGACAGGAAAAACAGCTGGCAT  
GGAAGATGAAAGAGAAGATGTTCAAAGAAAACATTTCACAAAATGGGTAANTGCACA

**b**

**New exon 1 related RACE sequence** (chromosome X position of the sequence in black corresponding to the new exon 1 : 33101211-33101853 (BLAT DNA 2009 (GRCh37/hg19)), [GenBank: KT072086].

ATACAGAAAATAGGAGGATAGTTTTGGAAGGGATACTCTTGGACTTCTTGGTTAGGGATCTGATTTGGAAGGCCTTCTGTC  
CCTCTTGTCTTTGCATGTGTTTAAATATGTGAAAGGGATCTCAGAAGGGGTGCTGATAGAAGTCCAGCATGCCTAACTC  
AGAGAACCCTCCTTATTTGTCTGGTCACATTCAGTGAGCTCTAAAGAAGGCTCAACAGTCTGTCTCAGGGTGACTAT  
CTGCTCTTTCCCTTGCCAGAGACCTCATTGTGAATTACCGTTCAGAGGTCATCCGTCCACCTGGTGTGGATCAAAGA  
CAACAGGGACCAAGATGAAAAATTTGAGCTTTGCCAGGCTGATATTGGGTGCGGAAAGAGGTGACTAATGTCTGTTTT  
GTTATGTGATTTTGTCTGGGTTGGAAAATGTTAATTCAGTCCCATGCAGCCCGTTGGGCAGAATCTTGCAAATTAAGA  
ATCTTGTTTATGGTTCCATAAAATGGTAAAGGGTGATTTTATCTTGTAAGTGGCTTAAACCCACAGCTATAGCACAAG  
CAAGCAGGGTCGTAAGACGCCACTCCGTTCTTCTGGAAGCTGCAGAGAAAGGGAACCCAGAAACCTGGCATCCAGCA  
ATAAGGATGAAAGAGAAGATGTTCAAAGAAAACATTTCACAAAATGGGTAANTGCACA
