# Supplementary material for: Dp412e: a novel human embryonic dystrophin isoform induced by BMP4 in early differentiated cells
Source: PubMed Central journal article supplement (PMC4644319; doi:10.1186/s13395-015-0062-6), 2015-11-14

a

5' Upstream

3' Downstream

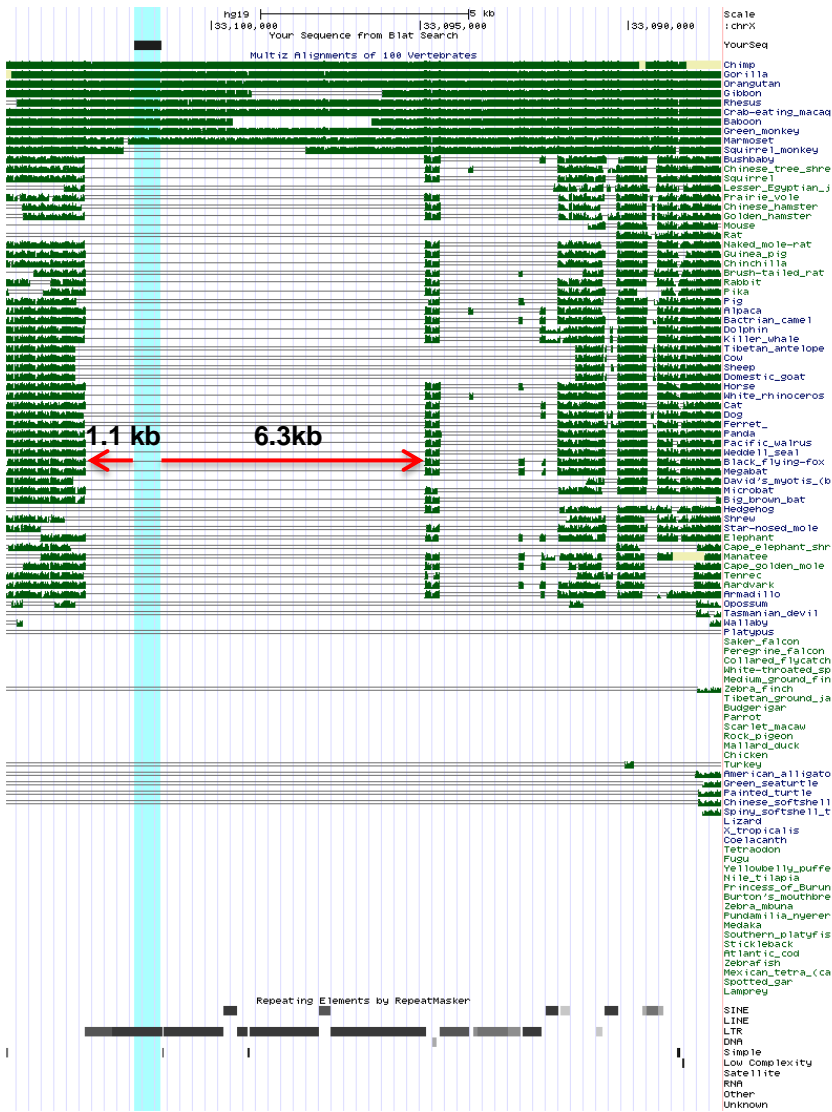

b

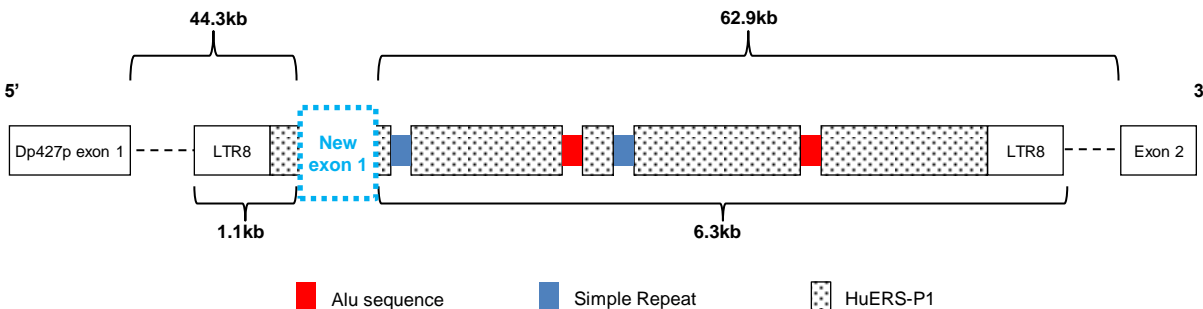

Supplement: 13395_2015_62_MOESM7_ESM.pdf [file 13395_2015_62_MOESM7_ESM.pdf]
