# Supplementary material for: Dp412e: a novel human embryonic dystrophin isoform induced by BMP4 in early differentiated cells
Source: PubMed Central journal article supplement (PMC4644319; doi:10.1186/s13395-015-0062-6), 2015-11-14
Supplement: 13395_2015_62_MOESM8_ESM.pdf [file 13395_2015_62_MOESM8_ESM.pdf]

IQKIGG Stop FGRDRTLGLLG Stop GSDLEGLLSLLSLHVFYVKGISEGVADRSPACLTQRTLLICLVTFSEL  
Stop RRLNSPVSQGDYLLFPLPRDLIVNRYSEVIRPHLVWIKDNRDQDEKF Stop ALPG Stop YWVRKEVTNV  
CFV Met CILLGWK Met LIQPF Met QPVGQNLAN Stop ESCLWFHK Met VKGDFL Stop SGLNPTAIAQASRVVR  
RHSVLEEAEGKNPETWHPSNKDEREDVQKFTFKWVNAQVFSKFGKHLENLFDSDLQDGRLLDLLEG  
LTGQKLPKEKGSTRVHALNNVNKAALRVLQNNNVLDLVNIGSTDIVDGNHKLTLGLIWNILHWQVKNV Met  
KNI Met AGLQQTNSEKILLSWVRQSTRNYPQVNVINFTLWYSDGLALNALIHSRPLDFDWNVSVCQS  
ATQRLEHAFNARIYQLGIEKLLDPEDVDTTYPDKKSIL Met YITSLFQVLPQQVSVIEAIQVE Met LPRPPKV  
TKEEHFQLHHQ Met HYSQQITVSLAQQGYERTSSPKPRFKSYAYTQAAYVTTSDPTRSPFPSPQHLEAPED  
KSFSGSL Met ESEVNLDRYKQTALEEVLSWLLSAEDTLQAQGEISNDVEVVKDQFHTHEGY Met Met DLTAH  
QGRVGNILQEGSKLIGTKLSEDEETEVEQEQ Met NLLNSRWECLRVAS Met EKQSNLHRV Met DLQNKQL  
KELNDWLTKTEERTRK Met EEEPLGPDLEDLKRQVQKHVLQEDLEQEQRVNSLTH Met VVVVDESSG  
DHATAALEEQKLVGLDRWANICRWTEQDRWVLLQDILLKWQRLTTEEQCLFSAWLSSEKEDAVNKIHTTGF  
KDQNE Met LSSLQKLVADLWADLEKKKQS Met GKLYSLKQDLLSTLNKNSVTQKTEAWLDFARCVDNLVQ  
KLEKSTAAISQAVTTTQPSLTQTTV Met ETVTTVTREQILVKHAQEELPPPPQKKRQITVDSSEIRKRLD  
VDITELHSWITRSEAVLQSPFAIFRKEGNFSDLKEKVNAIEREKAKEKFRKLQDASRSAQALVEQ Met VN  
EGVNASDIKQASEQLNSRIEFCQLLSERLNWLLEYQNNIIAFYNQLQLEQ Met TTTAENWLKIQPTTSP  
EPTAISKQICKICKEDVNRSLGQLPQIERLKIQSIALKEKGGQ Met FLQADDFVAFTNHFQVFSQVAREK  
ELQTFIDTLPP Met RYQET Met SAIRTWVQQSETKLSIPQLSVTDYEI Met EQRLGELQALQSSSQEQQSG  
YLLSTTVKE Met SKKAPSEIRKYQSEFEEIEGRWKKLSSQLVEHCQKLEE Met NKLRKIQNHQITLKKW  
Met AETVDVFLKEEPALGDSEILKYLKQCRLLVSDIQTQPLNSVNEGQKIKNEAPEFASRLETEL  
KELNTQWDH Met CQQVYARKEALKGGLEKTVSLQKDLSE Met HEW Met TQAEVEYLERDFEYKTPDELQK  
AVEE Met KRAKEEAQKQKAEKVKLLTESVNSVIAQAPPVAQEAALKELETLTNTNYQWLCTRNLNGKCTLEE  
VWACWHELLSLEKANKWLNVEFKLKTENIPGGAEEISEVLDLENL Met RHSEDNPNRIGRICKTLT  
DGGV Met DELINEELETNSRWRELHEEAVRQKLEEQSIQSAQETEKSLHLIQESLTFIDKQLAAYIADK  
VDAAQ Met PQEAQKIQSDLTSHEISLEE Met KKHNGQKEAAQRVLSQIDVAQKKLQDVS Met KFRLFQKPA  
NFEQRLQESK Met ILDEVK Met HLPALETKSVEQEVVQSALNHCVNLYKSEVKESE Met VIKTRGQIVQ  
KKQTNPKELDERVTALKLHYNLEGAKVTERKQQLKCLKLSRK Met RKE Met NVLTEWLAATD Met ELTK  
RSAVEG Met PSNLDSEVAWGKATQKEIEKQKVHLKSITEVGEALKTVLGKKTETLVEDKLSLLNSNWIAVT  
SRAEEWLNLLLEYQKH Met ETFDQNVDHITKWIIQADTLLESEKPKKQKEDVLKRLKAELNDRPKVD  
STRDQAANL Met ANRGDHCRLKLEVPQISELNHWFAAISHRIKTKASIPKLEQFNSDIQKLLPLEAEI  
QQGVNLKEEDFNKD Met NEDNEGTVKELLQRGDNLQQRITDERKREEIKIQQLLQTKHNALKDLRSQR  
RKKALEISHQWYQYKQKADDLKCLDDIEKKLASLPEPRDERKIKEIDRELQKKKEENLAVRRQAEGLS  
EDGAA Met AVEPTQYKLRKRWREIESKFAQFRLNFAQITVREET Met Met V Met TED Met PLEISYVPSTYL  
TEITHVSQALLEVEQLLNAPDLC AKDFEDLFKQEEESLKNIKDSLQSSGRIDIHHSKTAALQSATPVER  
VKLQEAALSQDLDFQWEKVNK Met YKDRQGRFRDSVEKWRRFHYD IKIFNQWLTEAEQFLKTKQIPENWEH  
AKYKWLKELQDGIQRTVTVTLNATGEEIIQVQSKTDASILQEKGLSLNLRVEQVCKLSDRKRLE  
EQKNILSEFQDLNEFVWLVEEADNIASIPLEPGKEQQLKEKLEQVLLVEELPLRQGILKQLNETGGPV  
LVSAPISPEEQDKLENLKLQTNLQWIKVSRALPEKQGEIEAQIKDLGQLEKLELDEQLNHELLLWLSPI  
RNQLEIYNPNQEGPFDVQNETEIAVQAKQPDVEILSKGQHLYKEKPATQPVKRKLDELSSHEWKAVERN  
LLQELRAKQPDLAGLTTIGASPTQVTVLTVQPVVTKETAIKLE Met PSSL Met LEVPALADFNRAWTELT  
DWLSLLDQVIKSQRV Met VGDLEDINE Met IIKQKAT Met QDLEQRRPQLEELITAAQNLKNKTSNQEARTII  
TDRIERIQNQWDEVQHELNRRDQQLNE Met LKJSTQWLEAKEAEAEVQLGQARAKLESWKEGPTYVDAI  
QKKITETKQALKDLRQWQTNVQDADLAKLLRDYSADDRKXV Met ITENINASWRSIHKRVSEAREAL  
EETHRLLQQFPDLDEKFLAWLTEAETTANVLQDATRKERLLEDKSGVKEL Met KQWQDLQGEIEAHTDV  
YHNLDENSQKILRSLEGSDDAVLLQRRLDN Met NFKW SELRKKSLNIRSHLEASSDQWKRHLHLSQLLELV  
WLLQKDDLSRQAPIGGDFPAVQKQNDVHRAFRELKTKPVI Met STLETVRIFLTEQPLEGLEKLYQE  
PRELPPEERAAQNVTRLLRKQAAEEVNTWEKLNLSADWQRKIDETLERLQELQEATDELDKLRQAEVI  
KGSVQPVGDLRLDLSLQDHLEKVKALRGEIAPLKVENVSHVNDLARQLTTLGILQSPYNLSTLEDLNRTRW  
LLQVAVEDRVRQLHEAHRDFGPAQSQHLSTSVKQGPWERAI SPNKVPYIINHETQTTCTWDHPK Met TELY  
QSLADLNNVRFSAYRTA Met KLRRQLKALCLDLLSLSAACDALDQHNLKQNDQP Met DILQIINCLTTIYDR  
LEQEHLNVLNVLCQV Met CLNWLWLVYDTRGTRGIRVLSFKTGIISLCKAHLEDKYRYLFKQVASTGF  
CDQRRLLGLLHDSIQPRQLGVEVASFFGSGNIEPSRVSCFQFANNKPEIAAFLDW Met RLEPQS Met VWL  
PVLHRVAAAEATAKHQAACNICKECPIIGFRYRSLKHFNYDICQSCFFSGRVAKGHK Met HYP Met VEYCTP  
TTSGEDVRDFAKVLKKNKFRTKRYFAKHPR Met GYLPVQTVLEGDN Met ETPTVTLINFWPVD SAPASSPQL  
SHDDTHSRIEHYASRLAE Met ENSNGSYLNDISPNE SIDDEHLLIQHYCQSLNQLD SPLSQPRSAPIILIS  
LESEERGEHERILADLEENRNLQAEDYRLKQHEHKGLPDLSPSE Met Met PTSPQSPRDAELIAEAKL  
LRQHKGRLEAR Met QILEDHNKQLESQHLRLRQLLEQPQAEAKVNGTTVSSPSTSLQRSDDSSQP Met LLR  
VVGSGTSDS Met GEEDLSPQDSTGLVEEV Met EQLNNSFPSSRGRNTPGK Met REDT Met Stop EVFST  
WQ Met IWAERWSP Stop YQ Stop Q Met KKEQNKCTLTPDSR Met VFIIQQRGLDLSKLEINLYFCGE Stop  
WYYTVD FSSF Stop VCYCFVNNGRFYTS Met QLYKKVIRKLVHVS Stop Stop LNNLPFLY Met ERILGCLKIYN  
SYKERL Stop TKVCFIKKSL Stop KPLKTKQHTHTHTHTHTKL Stop GSALFCILLA Stop YPYEIHGFFFFCI  
LKIRLPLPHQ Met TTHCSFENCQLSAGLSFHFIYLVYKYINTIVI Stop IKRYEFL Stop TDFHFLNVHV  
TS Stop Stop KEITSSQSRLLTCLV Stop NGFFPEPEARRKLLHHTKLTSTAPDVSHFKQLSTDNSEKVKYWF  
LKGTC Stop IHRTYIIRVSNRLVG Stop LID Stop LIHSASCC Stop QCHDLD Met Met LQWKSIRRYSDLVNIR  
RYFLT PKQ Stop QDDDRAGLWIPSPSL Stop RSRPLFSK Stop RIG Stop LFIHKVLCNYN Stop II Met PSSHSQK  
ELGGLVFAFLDLLSHVQ Stop VFKCHKT Stop FKINKLWEKV Stop NSSPITFVLGTGINPEAEHLCHFPLHF  
SASSSTQVCK Stop VRKKAN Stop FKCYKKTLLGGDLRLNI Stop TNKQKLLKKEEKSSRGKAKDW Stop EKAL  
LFHAILFLDF Stop IIHSIDTT Stop PIILQICYL Stop HQV Stop LAFGEWADIKCN Stop LLESGFCPLLIN Stop  
LTSNTASHAISTSLWFVGVPDNCALHSSQLHLLSALVFSFSFIILSFSFIIFKRKPKALR Stop QITKLHEDL  
VFVLHFFPLCDAGPFLYPRIFKTI Stop NKGLLYILLRSLSK Stop VSF Stop NQR Stop IECINNFVLIFFLF  
Stop TH Stop LWSESVIIFEQKLRALLLHFKNH Stop FGHYFVLC SL Stop PPSIKL Stop II Met Stop LKHKHH Met AC  
FVIVRY Stop Stop VLT Stop VS Stop YIVF Stop HQHCNIYELFF Stop TSVLLHFHNISDFTKY Met PYYCIIVLLYCVS  
Q Stop STQLCY
