# Supplementary material for: Dp412e: a novel human embryonic dystrophin isoform induced by BMP4 in early differentiated cells
Source: PubMed Central journal article supplement (PMC4644319; doi:10.1186/s13395-015-0062-6), 2015-11-14
Supplement: 13395_2015_62_MOESM9_ESM.pdf [file 13395_2015_62_MOESM9_ESM.pdf]

| Fold change            | Dp427m | Dp427c | Dp412e   |
|------------------------|--------|--------|----------|
| hiPSCs 1 + BMP4        | 1      | 1      | 1        |
| Fetuses 7-11 weeks     | 6.16   | 0.05   | 1.56E-05 |
| Fetal brain            | 5.71   | 4.11   | 7.95E-07 |
| Brain (whole)          | 42.79  | 13.09  | 2.51E-07 |
| Brain, cerebellum      | 152.15 | 15.32  | 1.89E-07 |
| Brain, cerebral cortex | 86.82  | 33.66  | 2.56E-07 |
| Thyroid                | 118.34 | 0.20   | 6.16E-07 |
| Trachea                | 124.03 | 1.80   | 5.00E-07 |
| Adrenal                | 143.24 | 1.78   | 5.90E-07 |
| Salivary gland         | 167.89 | 0.23   | 1.22E-06 |

| Fold change     | Dp427m  | Dp427c | Dp412e   |
|-----------------|---------|--------|----------|
| Total heart     | 958.96  | 0.05   | 3.25E-04 |
| Fetal heart     | 4112.12 | 0.24   | 7.49E-07 |
| Lung            | 105.27  | 0.09   | 6.77E-07 |
| Small intestine | 505.07  | 0.53   | 9.47E-07 |
| Colon           | 583.13  | 0.37   | 1.04E-06 |
| Stomach         | 1407.58 | 0.54   | 1.34E-06 |
| Smooth muscle   | 482.82  | 0.47   | 4.38E-07 |
| Skeletal muscle | 2931.32 | 1.70   | 4.61E-07 |
| Prostate        | 919.48  | 1.62   | 1.01E-04 |
| Testis          | 125.70  | 0.03   | 2.10E-06 |
| Ovary           | 771.83  | 0.09   | 8.26E-06 |
| Uterus          | 1215.22 | 0.47   | 8.45E-07 |
